# Supplementary material for: Oxodiperoxo molybdenum modified mesoporous MCM-41 materials for the catalytic epoxidation of cycloocteneElectronic supplementary information (ESI) available: experimental data. See http://www.rsc.org/suppdata/cc/b2/b207645d/
Source: Royal Society of Chemistry journal article supplement (doi:10.1039/b207645d), 2002-09-19
Supplement: b207645d.doc [file b207645d.doc]

**Supplementary material:**

**Experimental data:**

MoO(O2)2·(DMF)2,[A] 2-(3-pyrazolyl)pyridine,[B,C] and [3-(2-pyridyl)-1-pyrazolyl] aceticacid ethylester[D] were synthesized according to published procedures.

A H. Mimoun, I. Seree de Roch, L. Sajus, *Bull. Soc. Chim. Fr.*, 1969, 1481.

B H. Brunner, T. Scheck, *Chem. Ber.*, 1992, **125**, 701.

C A.-K. Pleier, H. Glas, M. Grosche, P. Sirsch, W. R. Thiel, *Synthesis*, 2001, 55.

D W. R. Thiel, M. Angstl, T. Priermeier, *Chem. Ber.,* 1994, **127**, 2373.

The assignment of the NMR spectra of the following compounds is according to this scheme:

For the free ligand **A1** and it's MoO(O2)2 complex **B1**

**(3-Triethoxysilylpropyl)[3-(2-pyridyl)-1-pyrazolyl]acetic amide (A1):** A mixture of 0.93 g (4.02 mmol) of [3-(2-pyridyl)-1-pyrazolyl] aceticacid ethylester and 0.89 g (4.02 mmol) of 3-triethoxysilylpropylamine was heated for 2 h to 150°C under argon. After this low boiling volatiles were removed in vacuum. The resulting oil was used without further purification.

This reaction is analogous to the synthesis of **octadecyl-[3-(2-pyridyl)-1-pyrazolyl]acetic amide (A2)**, which we published recently.[D]

Spectroscopic data of **A1** and **A2** are compared in the Table 1.

**Table 1** Comparison of the spectroscopic data of **A1** and **A2**.

|  | **A1** | **A2** |  | **A1** | **A2** |
| --- | --- | --- | --- | --- | --- |
|  | IR max/cm‑1 (KBr) | |  | IR max/cm‑1 (KBr) | |
| (N-H) | 3289 | 3308 | (C=O) | 1667 | 1675 |
|  | 1H NMR H (250.13 MHz, 25 °C, CDCl3) | |  | 13C{1H} NMR C (62.89 MHz, 25 °C, CDCl3) | |
| H11 | 8.49 [d, 3*J*(H10H11) 5.0] | 8.57 [dd, 3*J*(H10H11) 4.9] | CO | 166.7 | 166.7 |
| H8 | 7.80 [d, 3*J*(H8H9) 7.9] | 7.88 [d, 3*J*(H8H9) 7.9] | C7 | 152.7 | 153.4 |
| H9 | 7.57 [dt, 3*J*(H8H9) = 3*J*(H9H10) 7.9, 4*J*(H9H11) 1.8] | 7.69 [dt, 3*J*(H8H9) = 3*J*(H9H10) 7.7 4*J*(H9H11) 1.8] | C3 | 151.2 | 151.5 |
| H5 | 7.47 [d, 3*J*(H4H5) 2.4] | 7.49 [d, 3*J*(H4H5) 2.4] | C11 | 148.9 | 149.4 |
| H10 | 7.09 (m) | 7.19 (ddd) | C9 | 136.1 | 136.5 |
| H4 | 6.82 (d) | 6.92 (d) | C5 | 132.2 | 132.5 |
| NH | 6.65 (br) | 6.23 (br) | C10 | 122.2 | 122.7 |
| H12 | 4.78 (s) | 4.82 (s) | C8 | 119.7 | 120.0 |
| H16 | 3.62 [q, 3*J*(H16H17) 7.0] | -- | C4 | 104.9 | 105.4 |
| H13 | 3.13 [q, 3*J*(H13H14) 6.2] | -- | C16 | 57.7 | -- |
| H14 | 1.45 (m) | -- | C12 | 54.8 | 55.3 |
| H17 | 1.04 (t) | -- | C13 | 41.3 | -- |
| H15 | 0.38 (m) | -- | C14 | 23.3 | -- |
|  |  |  | C17 | 17.8 | -- |
|  |  |  | C15 | 7.0 | -- |

**Oxodiperoxo{(3-triethoxysilylpropyl)-[3-(2-pyridyl)-1-pyrazolyl]acetic amide}­molybdenum(VI) (B1):** 0.61 g (1.50 mmol) of **(**3-triethoxysilylpropyl)[3-(2-pyridyl)-1-pyrazolyl]acetic amide and 0.48 g (1.50 mmol) of MoO(O2)2·(DMF)2 were dissolved in 30 ml of CH2Cl2 and stirred for 4h h at room temperature. The solvent was removed in vacuum, the resulting yellow solid was washed with diethylether and dried in vacuum.

For comparison, spectroscopic data of **[octadecyl-[3-(2-pyridyl)-1-pyrazolyl]acetamide]oxodi-peroxomolybdenum(VI) (B2)** are listed together with the data of **B1** in Table 2. Owing to the low solubility of **B1**, probably caused by the formation of intermolecular hydrogen bonds of the amide fragment, CD3CN instead of CDCl3 had to be used as the solvent for the 13C{1H} NMR.

**Table 2 Comparison of the spectroscopic data of B1 and B2.**

|  | **B1** | **B2** |  | **B1** | **B2** |
| --- | --- | --- | --- | --- | --- |
|  | IR max/cm‑1 (KBr) | |  | IR max/cm‑1 (KBr) | |
| (N-H) | 3304 | 3337 | (C=O) | 1667 | 1675 |
|  | 1H NMR H (250.13 MHz, 25 °C, CDCl3) | |  | 13C{1H} NMR C (62.89 MHz, 25 °C, CD3CN (**B1**), CDCl3 (**B2**)) | |
| H11 | 9.32 [d, 3*J*(H10H11) 5.0] | 9.29 [dd, 3*J*(H10H11) 5.7, 4*J*(H9H11) 0.8] | CO | 165.9 | 164.9 |
| H9 | 8.28 [t, 3*J*(H8H9) = 3*J*(H9H10) 7.8] | 8.26 [dt, 3*J*(H8H9) =  3*J*(H9H10) 7.8, 4*J*(H9H11) 0.8] | C11 | 155.4 | 154.8 |
| H8 | 7.97 (d) | 7.96 (d) | C7 | 151.4 | 150.7 |
| H10 | 7.71 [t, 3*J*(H9H10) = 3*J*(H10H11) 7.8] | 7.69 (dt, 3*J*(H9H10) = 3*J*(H10H11) 7.8, 4*J*(H8H10) 1.2] | C3 | 150.2 | 145.5 |
| H5 | 7.57 [d, 3*J*(H4H5) 2.6] | 7.56 [d, 3*J*(H4H5) 2.7] | C9 | 144.8 | 142.9 |
| NH | 6.91 (br) | not obs. | C5 | 136.4 | 133.6 |
| H4 | 6.74 (d) | 6.74 (d) | C10 | 127.1 | 125.4 |
| H12 | 4.75 (s) | 4.72 (s) | C8 | 124.8 | 122.8 |
| H16 | 3.77 [q, 3*J*(H16H17) 7.0 Hz] | -- | C4 | 105.9 | 105.1 |
| H13 | 3.17 [q, 3*J*(H13H14) 6.0 Hz] | -- | C16 | 59.0 | -- |
| H14 | 1.60 (m) | -- | C12 | 54.8 | 57.2 |
| H17 | 1.18 (t) | -- | C13 | 42.8 | -- |
| H15 | 0.57 (m) | -- | C14 | 23.6 | -- |
|  |  |  | C17 | 18.7 | -- |
|  |  |  | C15 | 8.1 | -- |

**Figure 1 Supp.** 13C CP-MAS solid state NMRs of the modified mesoporous material **4a** compared with the resonances of the free complex **B1** (relative heights of the resonances are given).





 = free ethanol
